# Supplementary material
Source: MDPI journal article supplement (https://www.mdpi.com/2312-7481/9/12/232)
Supplement: s1 [file s1 › magnetochemistry-2708413-supplementary.pdf]

Article

# Effect of Topology Parameters on Physical–Mechanical Properties of Magnetic PLA 3D-Printed Structures

Lucie Zárybnická <sup>1,2,\*</sup>, Marek Pagáč <sup>3</sup>, Radek Ševčík <sup>2,4</sup>, Jaroslav Pokorný <sup>4</sup> and Martin Marek <sup>1</sup>

<sup>1</sup> Department of Technical Studies, College of Polytechnics Jihlava, Tolstého 16, 586 01 Jihlava, Czech Republic; martin.marek@vspj.cz

<sup>2</sup> Institute of Theoretical and Applied Mechanics of the Czech Academy of Sciences, Centre Telč, Prosecká 809/76, 190 00 Prague, Czech Republic; sevcik@itam.cas.cz

<sup>3</sup> Department of Machining, Assembly and Engineering Technology, Faculty of Mechanical Engineering, VSB-TU Ostrava, 17. Listopadu 2172/15, 708 00 Ostrava-Poruba, Czech Republic; marek.pagac@vsb.cz

<sup>4</sup> Department of Civil Engineering, Faculty of Technology, Institute of Technology and Business, Okružní 517/10, 370 01 České Budějovice, Czech Republic; jaroslav.pokorny@mail.vstecb.cz

\* Correspondence: lucie.zarybnicka@vspj.cz

**Citation:** Zárybnická, L.; Pagáč, M.; Ševčík, R.; Pokorný, J.; Marek, M. Effect of Topology Parameters on Physical–Mechanical Properties of Magnetic PLA 3D-Printed Structures. *Magnetochemistry* **2023**, *9*, 232. <https://doi.org/10.3390/magnetochemistry9120232>

Academic Editor: Alejandro Gómez Roca

Received: 25 October 2023

Revised: 1 December 2023

Accepted: 13 December 2023

Published: 18 December 2023

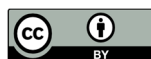

**Copyright:** © 2023 by the authors. Licensee MDPI, Basel, Switzerland. This article is an open access article distributed under the terms and conditions of the Creative Commons Attribution (CC BY) license (<https://creativecommons.org/licenses/by/4.0/>).

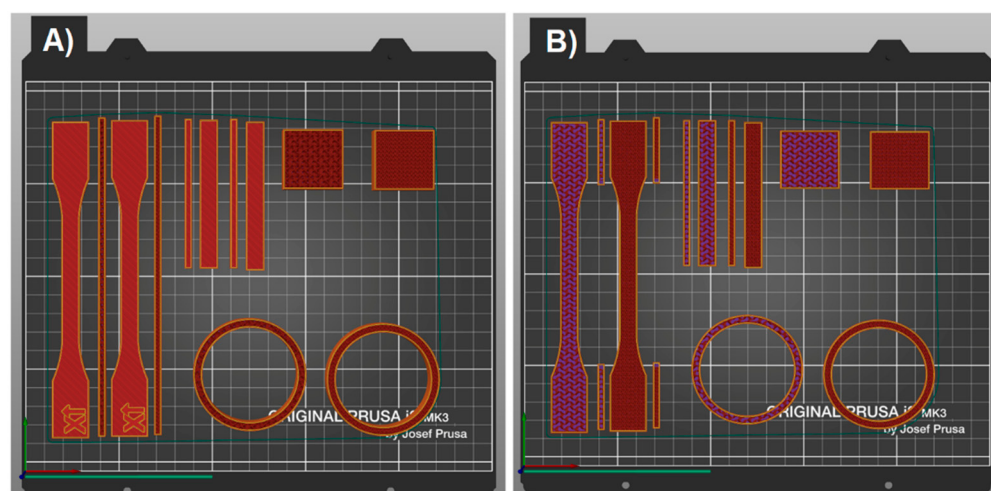

**Figure S1.** The example of sample layout when printing with xy orientation, where there are always two types of samples in each image; on the left a sample of 20% infill density, on the right a sample of 50% infill density.

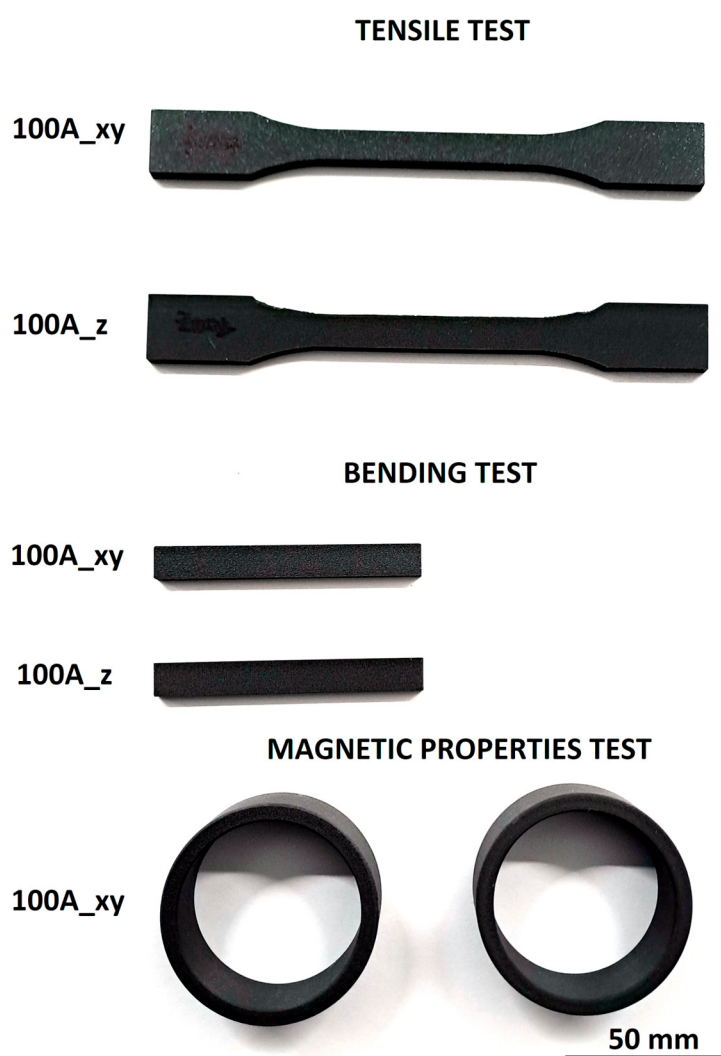

**Figure S2.** Examples of printed samples for individual types of testing.

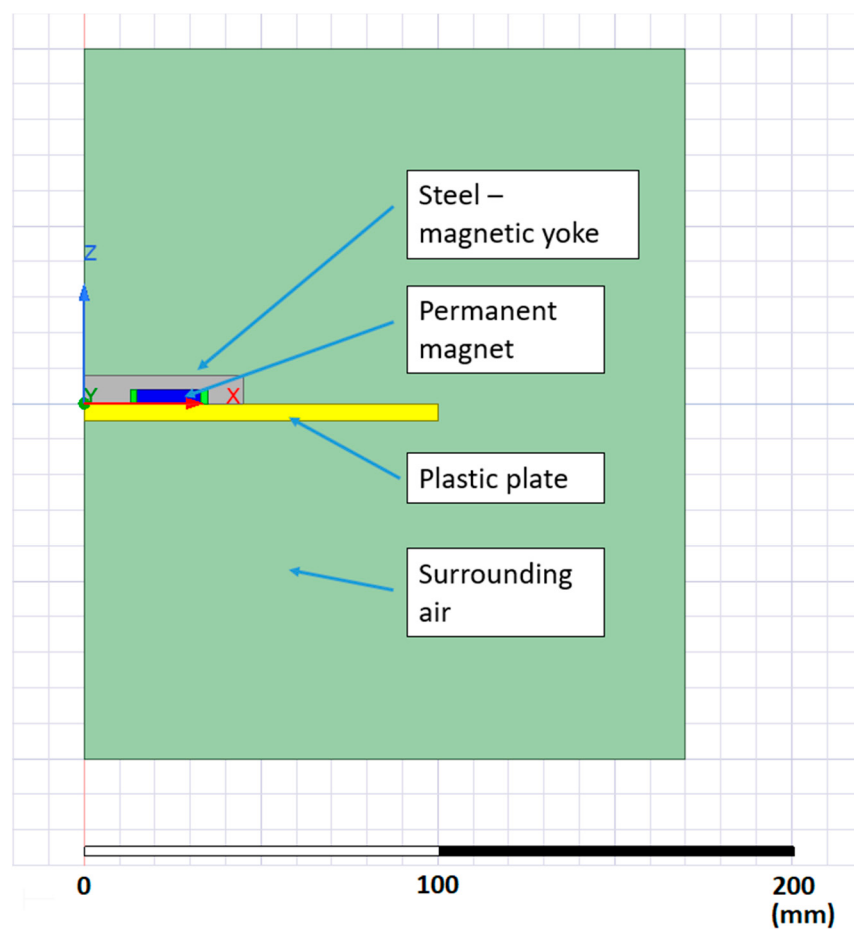

**Figure S3.** Realization of the FEM model of the magnet and the holding plastic plate (axisymmetric configuration about axis z).

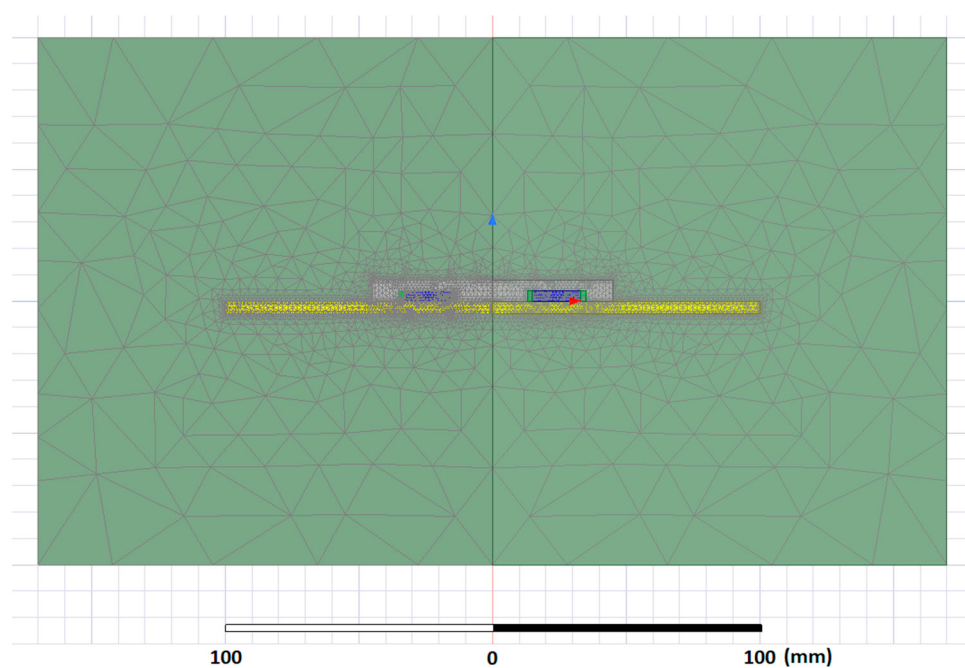

**Figure S4.** Implementation of the computational network of the magnet model and the holding plastic plate.

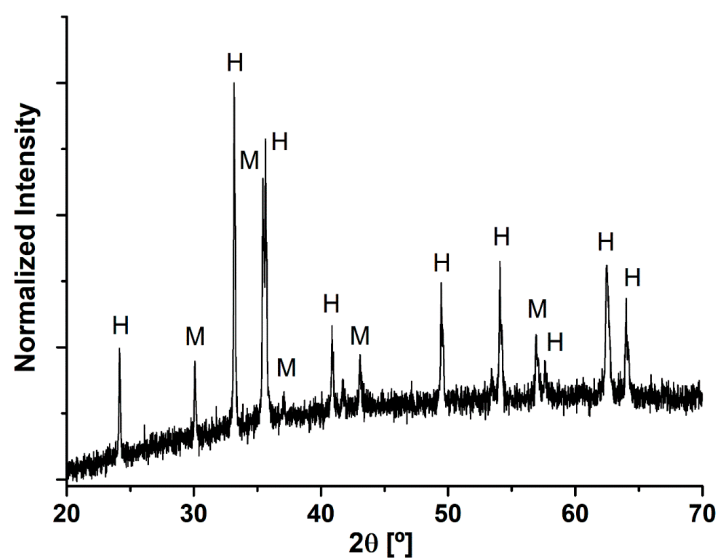

Figure S5. XRD pattern for magnetic additive with indication of corresponding phases, where M is for magnetite, H is for hematite.

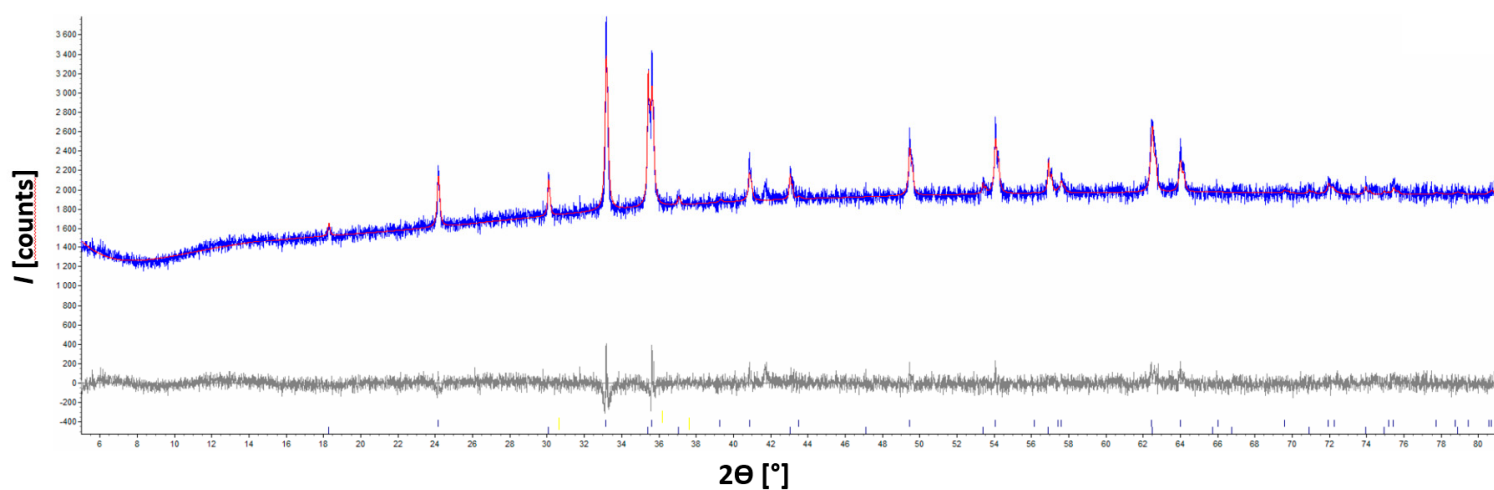

Fig. S6. Graphical output of the Rietveld refinement of the magnetic product: blue line – experimental spectrum; red line – calculated pattern; grey line – difference plot. RWP value characterizing the quality of fit was 2.665.

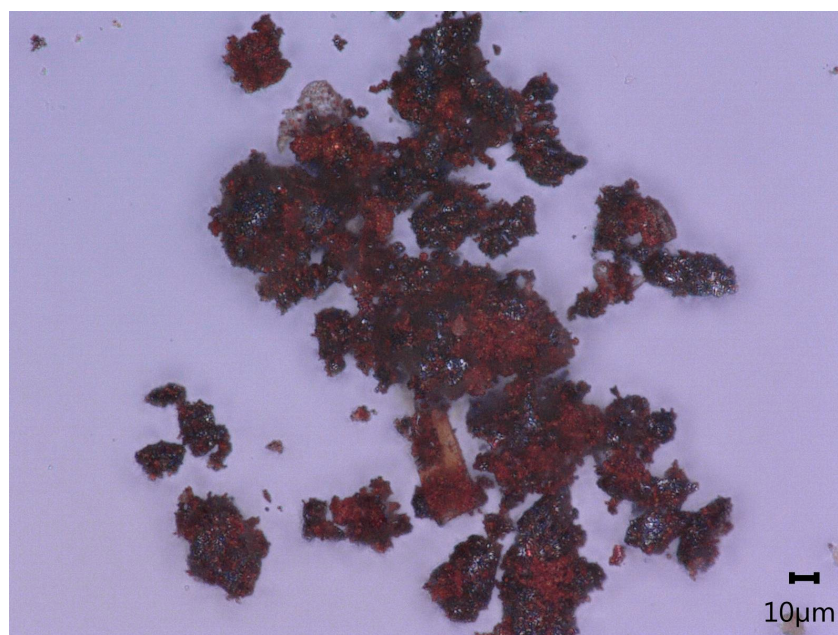

**Figure S7.** Microscopic image of used magnetic powder in filament.

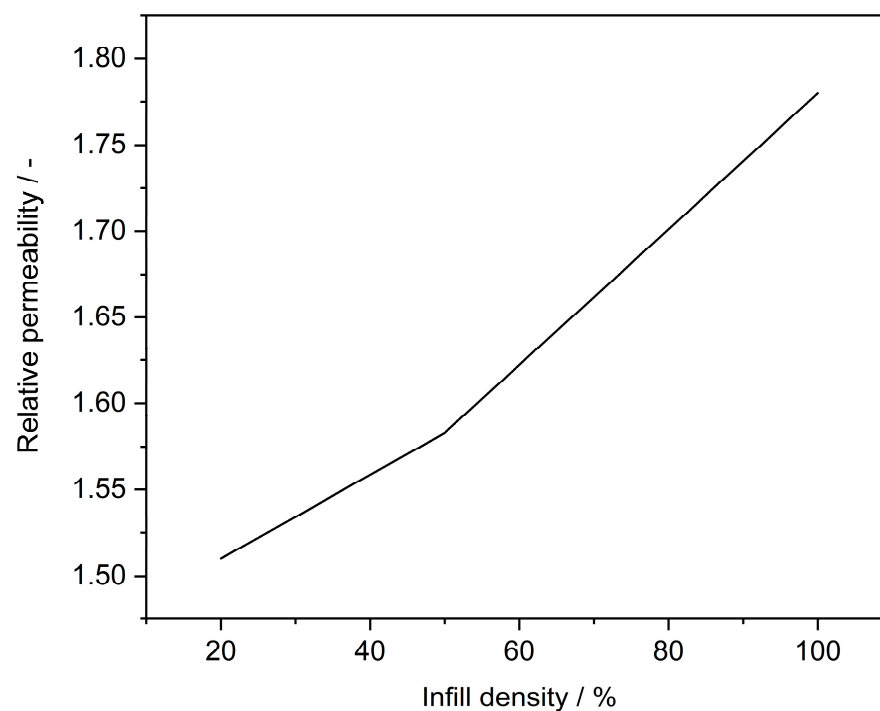

**Figure S8.** Dependence of relative permeability on increasing infill density in samples with magnetic additive content.

**Disclaimer/Publisher's Note:** The statements, opinions and data contained in all publications are solely those of the individual author(s) and contributor(s) and not of MDPI and/or the editor(s). MDPI and/or the editor(s) disclaim responsibility for any injury to people or property resulting from any ideas, methods, instructions or products referred to in the content.
